# Supplementary figures and images for: Oral pH Value Predicts the Incidence of Radiotherapy Related Caries in Nasopharyngeal Carcinoma Patients
Source: Research Square preprint supplement (doi:10.21203/rs.3.rs-114427/v1), 2020-12-04

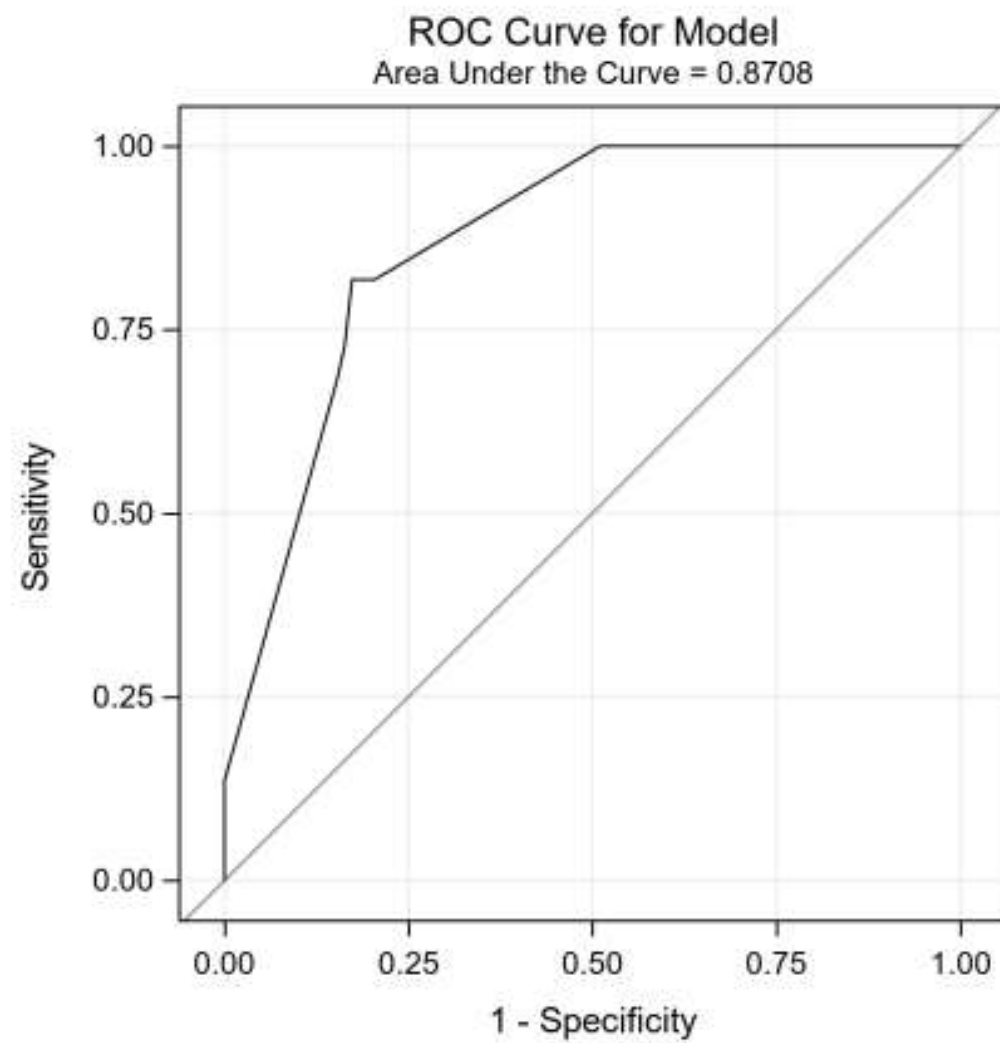

Supplementary figure 2

Supplement: Supplementary file 1 [file 2fae8161136ff363b989161d.pdf]

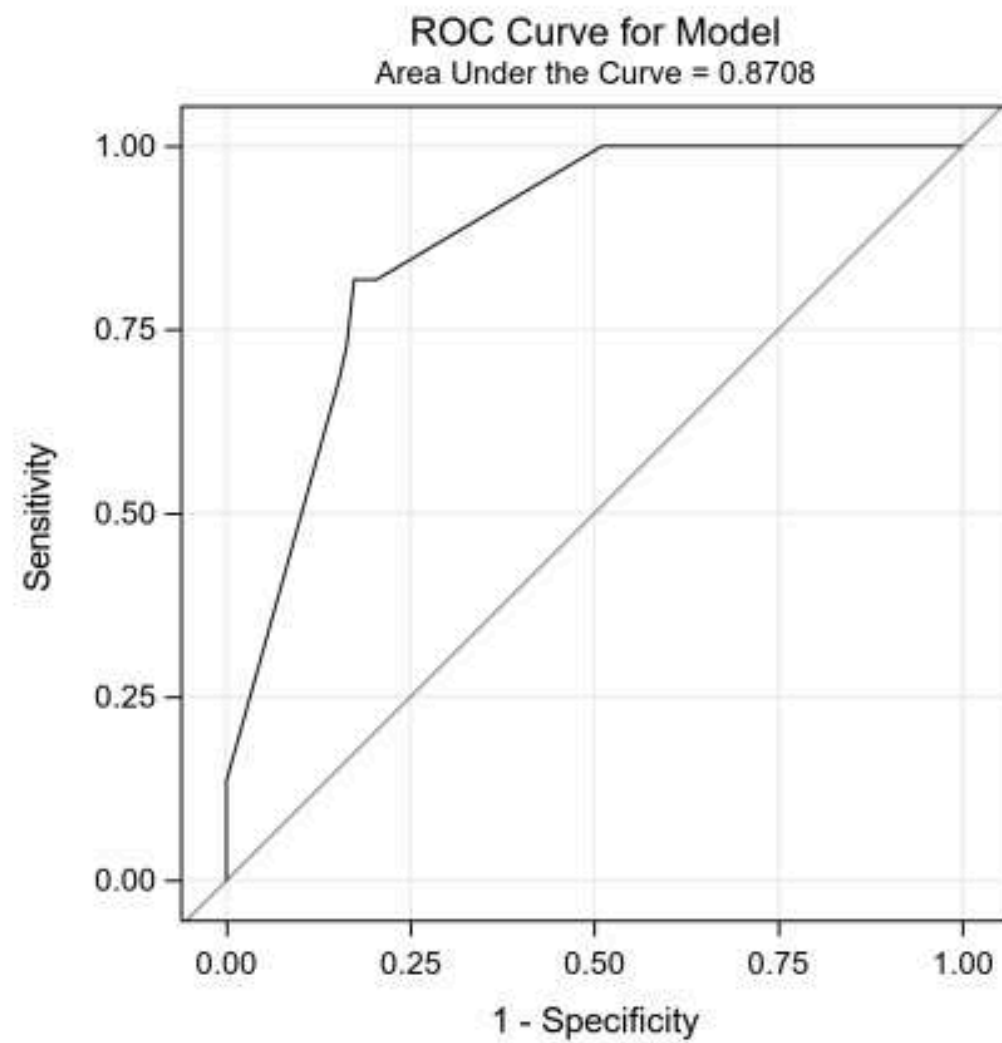

Supplement Figure 3.

Supplement: Supplementary file 2 [file 6d56999004260dadf2b58c60.pdf]
